# Supplementary material for: Prognostic Importance of Resistant Hypertension in Patients With Type 2 Diabetes: The Rio de Janeiro Type 2 Diabetes Cohort Study
Source: Oxford University Press journal article supplement (doi:10.2337/dc19-1534), 2019-10-16

## SUPPLEMENTARY DATA

**Title:** Prognostic Importance of Resistant Hypertension in Patients with Type 2 Diabetes: The Rio de Janeiro Type 2 Diabetes Cohort Study.

**Authors:** Claudia R L Cardoso, MD, PhD; Nathalie C Leite, MD, PhD; Giovanna Bacan; Dayane S Ataíde; Larissa K C Gorgonio; Gil F Salles, MD, PhD.

**Content:** Supplemental Table S1 and Figure S1.

## SUPPLEMENTARY DATA

Supplementary Table S1. Baseline characteristics and endpoints incidence of diabetic patients divided according to the presence or absence of apparent resistant hypertension and of white-coat (controlled) and true (uncontrolled) resistant hypertension, defined according to the 2017 ACC/AHA criteria (office BP  $\geq 130/80$  mmHg and ambulatory 24-hour BP  $\geq 125/75$  mmHg, respectively).

SUPPLEMENTARY DATA

| Characteristics                      | Non-apparent<br>RHT<br>(n=323) | Apparent RHT<br>(n=323) | White-coat<br>controlled RHT<br>(n=99) | True<br>uncontrolled<br>RHT<br>(n=234) |
|--------------------------------------|--------------------------------|-------------------------|----------------------------------------|----------------------------------------|
| Age (years)                          | 58.7 (10.1)                    | 61.7 (8.5) *            | 63.0 (7.6) *                           | 61.2 (8.8) †                           |
| Male sex (%)                         | 43.7                           | 33.4 †                  | 29.3 †                                 | 35.0 ‡                                 |
| Body mass index (kg/m <sup>2</sup> ) | 28.8 (4.8)                     | 30.7 (4.7) *            | 30.5 (4.8) †                           | 30.6 (4.7) *                           |
| Smoking, current/past (%)            | 48.1                           | 40.7                    | 40.4                                   | 40.8                                   |
| Physical activity (% active)         | 24.1                           | 20.5                    | 18.2                                   | 21.0                                   |
| Diabetes duration (years)            | 7 (2.5-15)                     | 9 (4-16) †              | 10 (5-18.5) *                          | 8 (4-15)                               |
| Chronic diabetic complications (%)   |                                |                         |                                        |                                        |
| Cerebrovascular disease              | 5.9                            | 13.3 †                  | 10.1                                   | 15.0 *                                 |
| Coronary artery disease              | 9.9                            | 22.0 *                  | 21.2 †                                 | 21.8 *                                 |
| Peripheral artery disease            | 13.0                           | 21.1 †                  | 19.4                                   | 21.8 †                                 |
| Retinopathy                          | 28.9                           | 35.7                    | 39.8 ‡                                 | 34.6                                   |
| Nephropathy                          | 23.8                           | 38.9 *                  | 27.8                                   | 41.8 *                                 |
| Peripheral neuropathy                | 26.6                           | 31.5                    | 28.6                                   | 31.8                                   |

# SUPPLEMENTARY DATA

|                                                            |           |             |            |              |
|------------------------------------------------------------|-----------|-------------|------------|--------------|
| Diabetes treatment (%)                                     |           |             |            |              |
| Metformin                                                  | 88.2      | 87.3        | 82.8       | 89.3         |
| Sulfonylureas                                              | 44.3      | 43.3        | 44.4       | 43.2         |
| Insulin                                                    | 43.7      | 52.9 ‡      | 49.5       | 54.3 ‡       |
| Aspirin                                                    | 87.9      | 94.9 †      | 94.9 ‡     | 93.9 ‡       |
| Dyslipidemia (%)                                           |           |             |            |              |
| Statins use (%)                                            | 73.1      | 82.6 †      | 81.8       | 83.2 †       |
| Blood pressures (mmHg)                                     |           |             |            |              |
| Office SBP                                                 | 133 (18)  | 158 (25) *  | 151 (23) * | 160 (26) *   |
| Office DBP                                                 | 78 (11)   | 86 (14) *   | 83 (14) *  | 86 (14) *    |
| Ambulatory 24h SBP                                         | 124 (12)  | 133 (17) *  | 116 (6) *  | 140 (14) *   |
| Ambulatory 24h DBP                                         | 73 (9)    | 75 (11) ‡   | 65 (6) *   | 79 (10) *    |
| Number of anti-hypertensive drugs                          | 1 (1-2)   | 3 (3-4) *   | 3 (3-4) *  | 3 (3-4) *    |
| Laboratory variables                                       |           |             |            |              |
| Fasting glycemia (mmol/l)                                  | 7.9 (2.7) | 8.4 (2.8) ‡ | 7.8 (2.6)  | 8.6 (2.9) *  |
| HbA <sub>1c</sub> (%)                                      | 7.5 (1.4) | 7.9 (1.6) * | 7.4 (1.3)  | 8.1 (1.7) *  |
| (mmol/mol)                                                 | 60 (15.3) | 63 (17.5)   | 57 (14.2)  | 65 (18.6)    |
| Triacylglycerol (mmol/l)                                   | 1.8 (1.2) | 2.0 (1.8)   | 1.9 (1.9)  | 2.1 (1.7) †  |
| HDL-cholesterol (mmol/l)                                   | 1.1 (0.3) | 1.1 (0.3)   | 1.1 (0.3)  | 1.1 (0.3)    |
| LDL-cholesterol (mmol/l)                                   | 2.8 (0.8) | 2.8 (0.9)   | 2.6 (0.8)  | 2.9 (0.9)    |
| Glomerular filtration rate<br>(ml/min/1.73m <sup>2</sup> ) | 86 (19)   | 76 (20) *   | 77 (20) *  | 76 (20) *    |
| Albuminuria (mg/24h)                                       | 12 (7-26) | 17 (7-66) † | 10 (6-32)  | 19 (8-104) * |

# SUPPLEMENTARY DATA

## Outcomes §

|                               |            |              |             |              |
|-------------------------------|------------|--------------|-------------|--------------|
| Total CVEs                    | 66 (21.8)  | 111 (42.2) * | 29 (33.6)   | 84 (45.3) *  |
| MACE                          | 53 (17.0)  | 92 (33.4) *  | 23 (25.4)   | 71 (36.6) *  |
| Cardiovascular mortality      | 31 (9.6)   | 70 (24.3) *  | 19 (20.3) † | 52 (25.6) *  |
| All-cause mortality           | 85 (26.3)  | 137 (47.5) * | 39 (41.7) † | 101 (49.7) * |
| Renal composite               | 93 (34.0)  | 107 (44.2)   | 26 (32.3)   | 82 (48.5) ‡  |
| Retinopathy                   |            |              |             |              |
| (incident/worsening) (n=526)  | 79 (49.5)  | 77 (53.0)    | 28 (61.3)   | 49 (47.4)    |
| Peripheral neuropathy         |            |              |             |              |
| (incident/ worsening) (n=510) | 81 (30.6%) | 93 (38.0%)   | 25 (30.9%)  | 59 (43.7%) ‡ |

Values are proportions, and means (standard deviations) or medians (interquartile range).

\* p<0.001; † p<0.01; ‡ p<0.05 for bivariate comparisons with the non-apparent RHT subgroup.

§ Values are absolute numbers (incidence rate per 1000 patient-years of follow-up), except for peripheral neuropathy that are absolute numbers (proportions).

Abbreviations: RHT, resistant hypertension; SBP, systolic blood pressure; DBP, diastolic blood pressure; HbA1c, glycated hemoglobin; HDL, high-density lipoprotein; LDL, low-density lipoprotein; CVEs, cardiovascular events; MACE, major adverse cardiovascular events.

## SUPPLEMENTARY DATA

Supplementary Figure S1. Kaplan-Meier estimation curves of cumulative events incidence during follow-up for major adverse cardiovascular events (MACE) outcome (panels A and B), for cardiovascular mortality (panels C and D), for all-cause mortality (panels E and F) and for the renal composite outcome (panels G and H), in patients classified as non-resistant hypertension (non-RHT), white-coat/controlled resistant hypertension (wc-RHT), and true uncontrolled resistant hypertension (true RHT) by 24-hour ambulatory BP levels defined by the traditional cut-off value ( $\geq 130/80$  mmHg, left panels A, C, E and G) and by the new 2017 ACC/AHA cut-off value ( $\geq 125/75$  mmHg, right panels B, D, F and H).

# SUPPLEMENTARY DATA

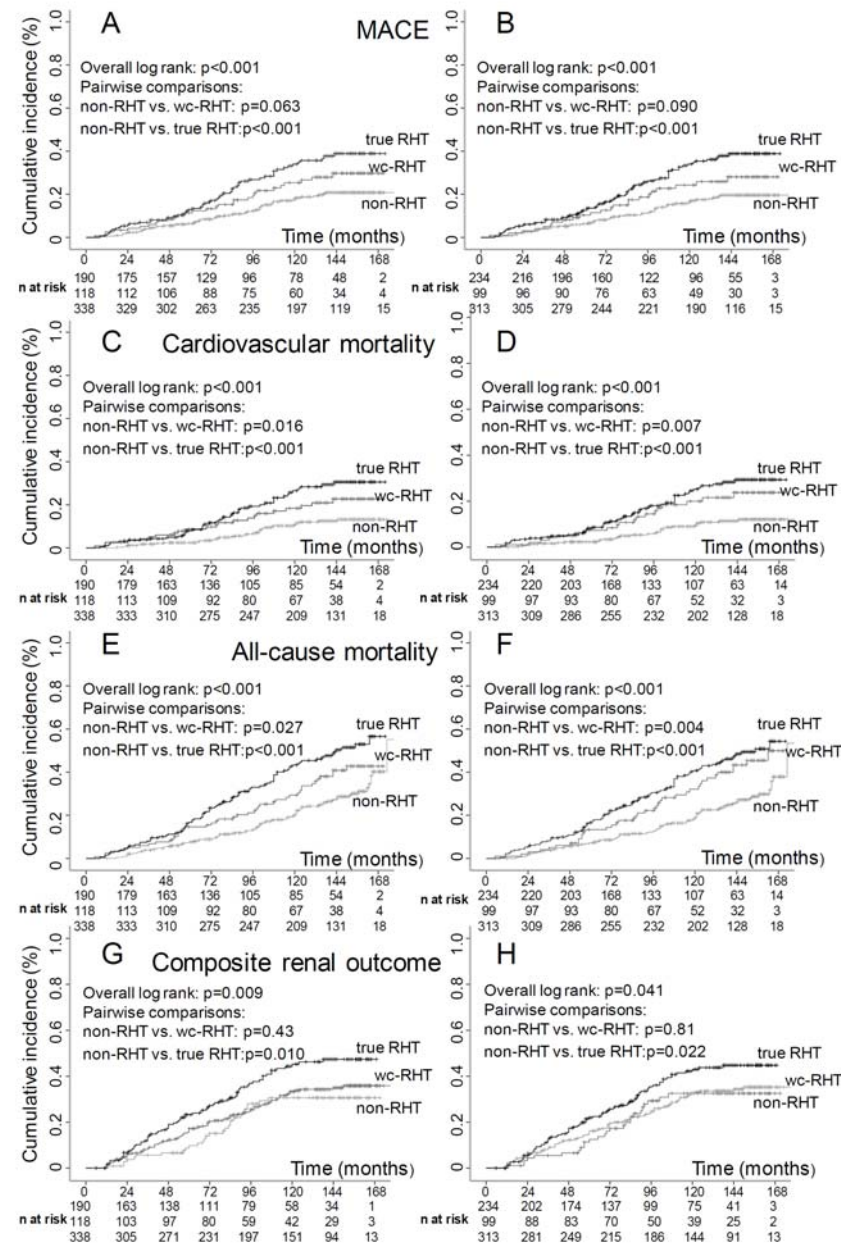

Supplement: dc191534supplementarydata.pdf [file dc191534supplementarydata.pdf]
